# Supplementary material for: Unveiling the role of surface iodine vacancies in CsPbI3 perovskite: carrier recombination dynamics and defect passivation mechanisms
Source: Royal Society of Chemistry journal article supplement (doi:10.1039/d4qi02533d), 2024-12-02
Supplement: d4qi02533d1.pdf [file d4qi02533d1.pdf]

## Electronic Supplementary Information (ESI)†

### Unveiling the Role of Surface Iodine Vacancies in CsPbI<sub>3</sub> Perovskite:

### Carrier Recombination Dynamics and Defect Passivation Mechanisms

Jing Wang <sup>\*a</sup> and Xiang-Mei Duan <sup>a</sup>

<sup>a</sup> School of Physical Science and Technology, Ningbo University, Ningbo 315211, China

## S1. Computational Details

### 1.1 Coupled kinetic equations

Table 1 in the text summarizes the carrier recombination rates  $1/\tau$  (described by the symbol  $k$ ) of pairwise transitions in the perfect surface, various surface  $V_i$  defects, and the systems after  $\text{HCOO}^-$  passivator, obtained by the exponential fitting. In order to systematically evaluate the total lifetime of excited carriers in various systems, it is necessary to consider participating in the whole carrier transition process. Therefore, we construct a dynamic model to describe the dynamic behavior of carrier coupling in these systems. The detailed description of carrier recombination/trapping dynamics is as follows:

(1) For the perfect and resonant defect systems, as well as the defect systems passivated by  $\text{HCOO}^-$ : carrier recombination between electrons in CBM and holes in VBM, see process 2 in Fig. 5a,  $k_{(CBM \rightarrow VBM)}$ .

(2) For systems with defective states within the band gap: carrier recombination between electrons in CBM and holes in VBM, see process 2 in Fig. 5b,  $k_{(CBM \rightarrow VBM)}$ ; electrons trapping by DS (process 3,  $k_{(CBM \rightarrow DS)}$ ); holes trapping by DS (process 4,  $k_{(VBM \rightarrow DS)}$ ).

Thus, for the perfect surface, the defective systems, as well as the defect systems passivated by  $\text{HCOO}^-$ , their coupled kinetic equations are:

$$\frac{d[VBM]}{dt} = -k_{(CBM \rightarrow VBM)}[VBM] \quad (1)$$

$$\frac{d[CBM]}{dt} = k_{(CBM \rightarrow VBM)}[CBM] \quad (2)$$

The coupled kinetics equations for the defect systems on the subsurface are:

$$\frac{d[VBM]}{dt} = -(k_{(CBM \rightarrow VBM)} + k_{(CBM \rightarrow DS)})[VBM] \quad (3)$$

$$\frac{d[DS]}{dt} = k_{(CBM \rightarrow DS)}[CBM] - k_{(DS \rightarrow VBM)}[DS] \quad (4)$$

$$\frac{d[CBM]}{dt} = k_{(CBM \rightarrow VBM)}[VBM] + k_{(DS \rightarrow VBM)}[DS] \quad (5)$$

Where [VBM], [DS] and [CBM] are populations of the VBM, defect and CBM states, respectively. The overall lifetime (or recombination rate) at CBM for all systems are obtained by the exponential fitting, and results are shown in Table 1 and Fig. 5(e-f).

Here, we use  $V_i$  defects located at the outermost layer and the subsurface Pb-nondimer structures as examples to describe the carrier relaxation and trapping processes, see Table 1 and Figs. 5(a-b). The carrier lifetime for the pairwise states is obtained by the DISH method, and the corresponding fitting results are shown in Figs. S4-S7.

## 1.2 Computational process of absorption energy

The absorption energy ( $E_{adsor}$ ) of passivator molecular ( $HCOO^-$ ) for  $CsPbI_3$  perovskite surface is calculated as:

$$E_{adsor} = E_{perov + mol} - E_{perov} - E_{mol} \quad (6)$$

where  $E_{perov + mol}$ ,  $E_{perov}$ , and  $E_{mol}$  represent the energy values of the passivated perovskite system, the bare perovskite, and the passivating molecule, respectively.

## S2. Supplementary Figures

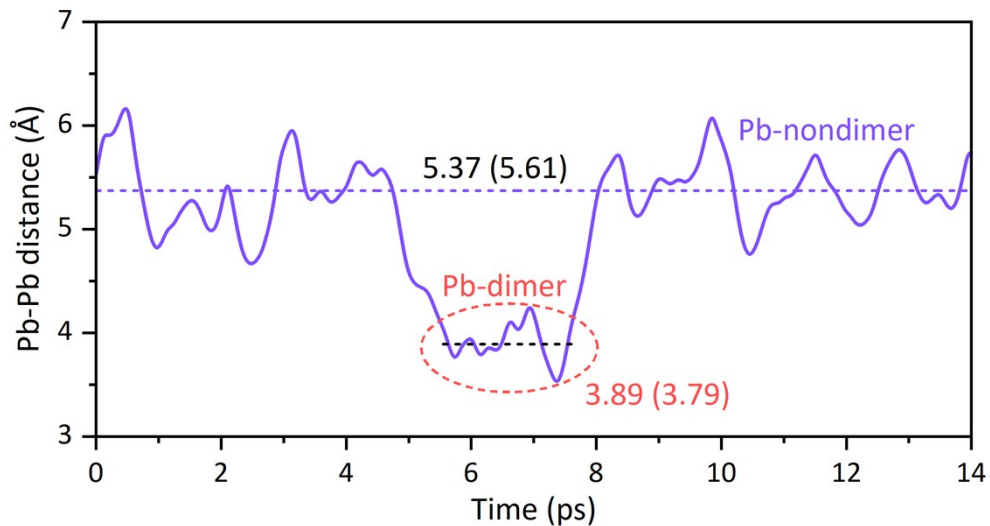

**Fig. S1.** Evolution of Pb-Pb distances around  $V_i$  defect on the subsurface. These data represent the standard average Pb-Pb distances along MD trajectory, while the values in parentheses are the Pb-Pb distance in the optimized ground state structures. The Pb-dimer configuration shows the temporary stability, which reveals that  $V_i$  defect on the subsurface is mainly Pb-nondimer configuration.

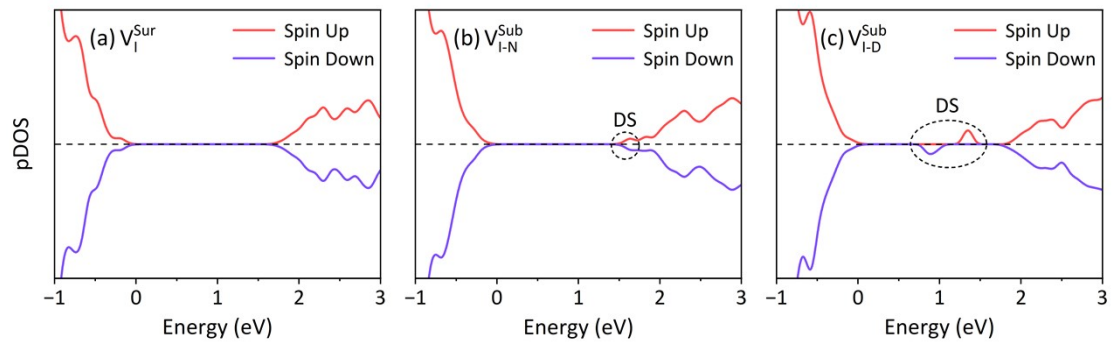

**Fig. S2.** Spin-polarized calculations of electronic structures on the (a)  $V_I^{Sur}$ , (b)  $V_{I-N}^{Sub}$  and (c)  $V_{I-D}^{Sub}$  defects, including the spin-up and spin-down results. The VBM level is set to zero.

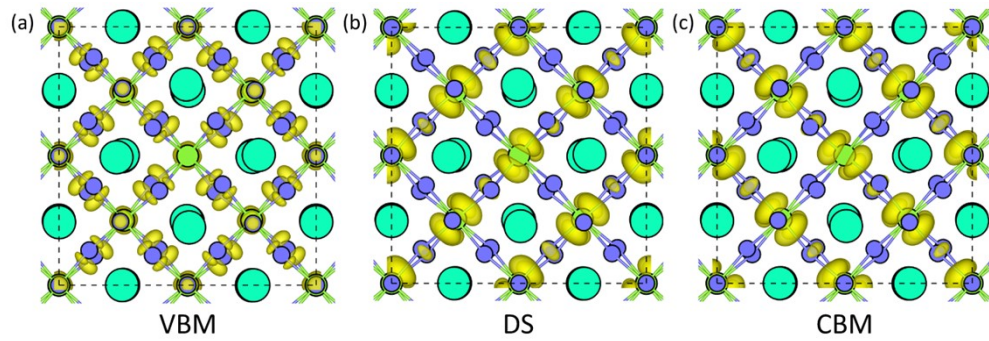

**Fig. S3.** Charge density distribution of  $V_I^{Sur}$  defect, including the VBM, defect state (DS), and CBM.

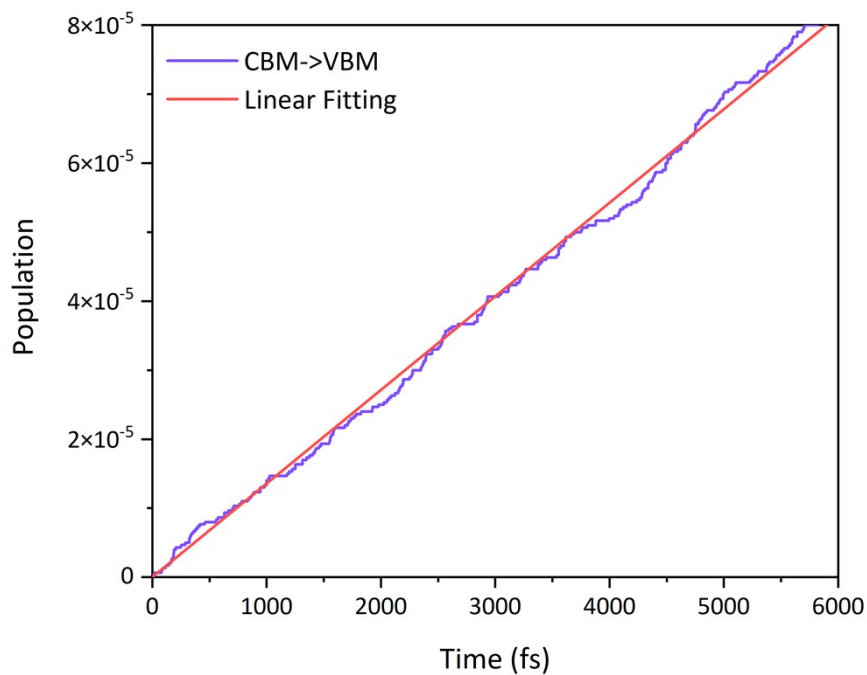

**Fig. S4.** Population evolution of CBM state due to the relaxation from CBM to VBM in the surface  $V_1$  defect localized at the outermost layer. The fitting function is  $f(t) = t/(7.37 \times 10^7)$ .

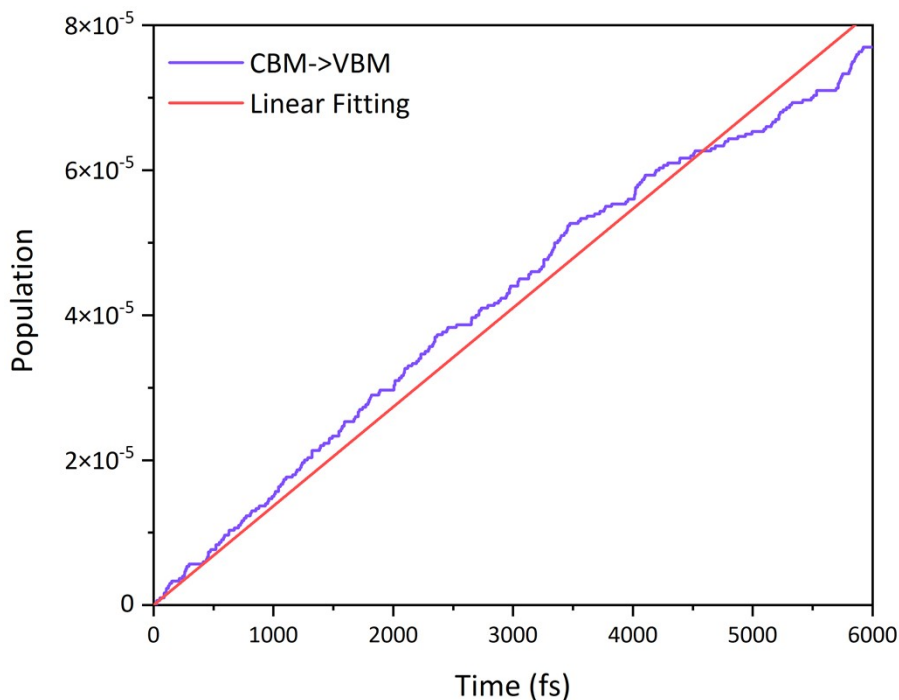

**Fig. S5.** Population evolution of CBM state due to the relaxation from CBM to VBM in  $V_1$  defect with Pb-dimer configuration localized at the subsurface layer. The fitting function is  $f(t) = t/(7.31 \times 10^7)$ .

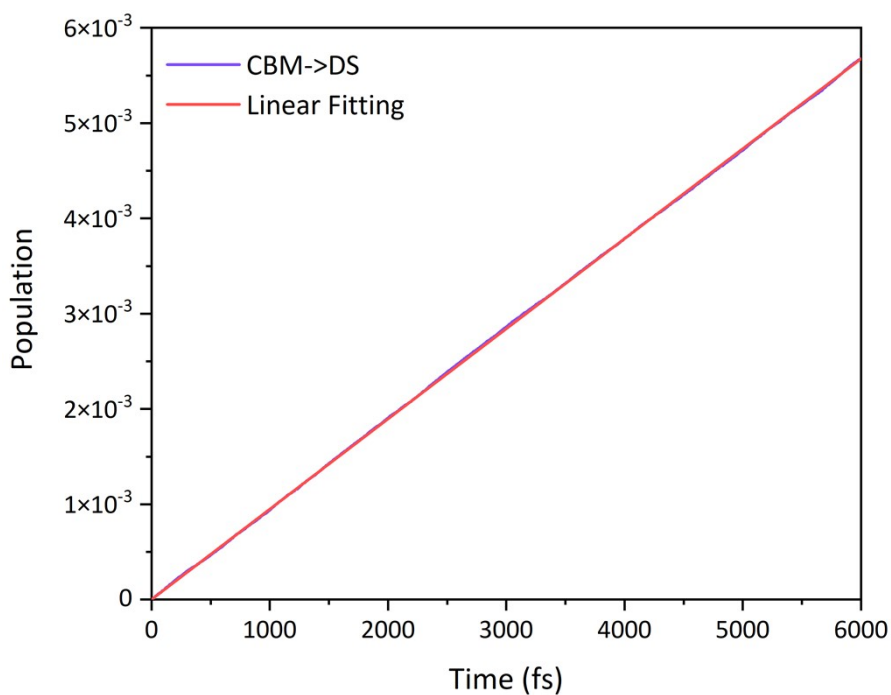

**Fig. S6.** Population evolution of DS during electron trapping in the  $V_1$  defect with Pb-dimer configuration localized at the subsurface layer. The fitting function is  $f(t) = t/(1.05 \times 10^6)$ .

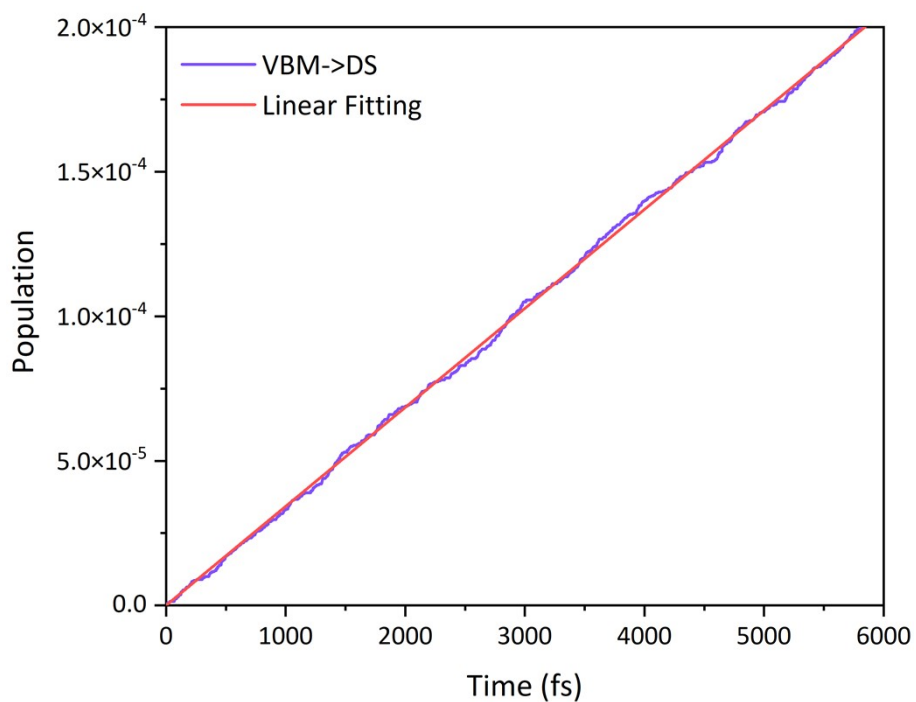

**Fig. S7.** Population evolution of DS during hole trapping in the  $V_1$  defect with Pb-dimer configuration localized at the subsurface layer. The fitting function is  $f(t) = t/(2.92 \times 10^7)$ .

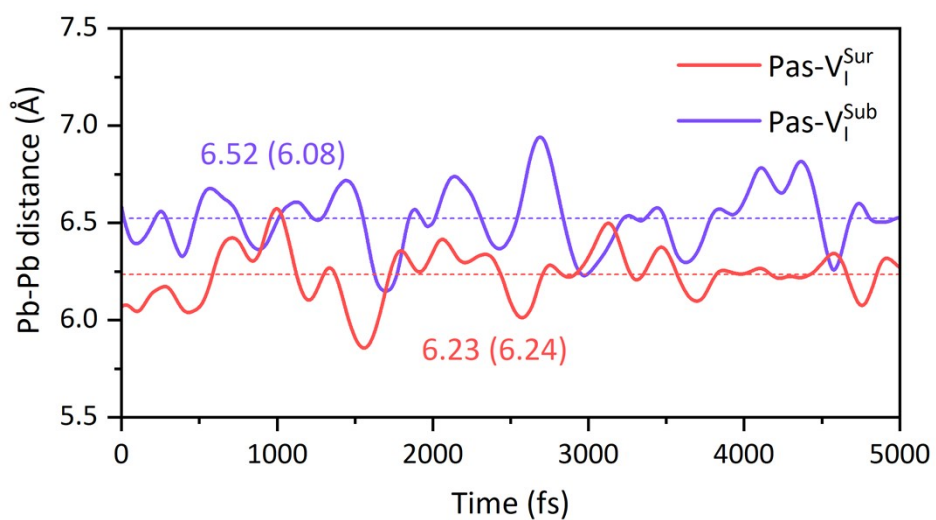

**Fig. S8.** Evolution of Pb-Pb distances after passivation of  $V_1$  on the perovskite surface with  $\text{HCOO}^-$ . These data represent the standard average Pb-Pb distances along MD trajectory, while values in parentheses are the Pb-Pb distance in the optimized ground state structures.
